# Supplementary material for: Longitudinal chemokine profile expression in a blood-brain barrier model from Alzheimer transgenic versus wild-type mice
Source: Springer Nature journal article supplement (doi:10.1186/s12974-018-1220-7), 2018-06-13
Supplement: MOESM1 [file 15843188]

## Additional File 1

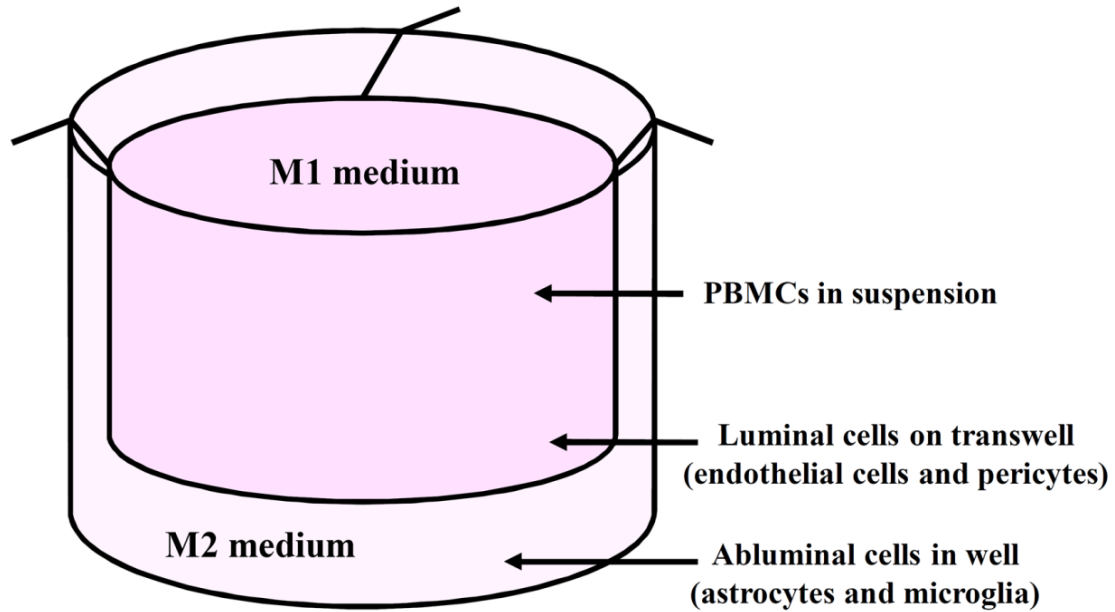

### Additional file 1: Schematic representation of the BBB model.

As stated in the Material and Methods, the luminal part is either of AD or WT phenotype and the abluminal part is always WT. All the cells that make up this model are primary cultures.
